# Supplementary material
Source: PubMed Central journal article supplement (PMC3754761)
Supplement: zjb999092797so1.pdf [file zjb999092797so1.pdf]

**SUPPLEMENTARY MATERIAL TO KLAFFL ET AL. 2013**

**Table S1. Oligonucleotides used in this study.**

| Function and oligonucleotide                                | Sequence (5' → 3') and properties <sup>a</sup>              |
|-------------------------------------------------------------|-------------------------------------------------------------|
| Deletion of cg0196 and PCR analysis of the resulting mutant |                                                             |
| iolR_DF1_for                                                | CCCAAGCTT <u>GAGG</u> TACTTGCCGAAAGATTG ( <i>HindIII</i> )  |
| iolR_DF1_rev                                                | CTCGATTACTTGGCCGGAGGGCTACTTGGAAGTAGAGG                      |
| iolR_DF2_for                                                | TCCGGCCAAGTAATCGAG                                          |
| iolR_DF2_rev                                                | CGGGATCCATCGCGTTGGCATTCTTC ( <i>BamHI</i> )                 |
| K_DiolR_for                                                 | GCACGTTATGACCTGCAAACCTC                                     |
| K_DiolR_rev                                                 | TACGGTCTGGCTATCTACATCC                                      |
| Overexpression of cg0196 in <i>E. coli</i> BL21 (DE3)       |                                                             |
| iolR_pET16b_for                                             | GGAATTC <u>CATATG</u> ACCACCGAAGCTCCCATTTGG ( <i>NdeI</i> ) |
| iolR_pET16b_rev                                             | CGGGATCCTTACCCTGCCACCAGAGTGGTTTC ( <i>BamHI</i> )           |
| DNA affinity chromatography and gel shift assays            |                                                             |
| bt_anchor                                                   | GACCACGCGTATCGATGTCGAG                                      |
| pck_btac_rev                                                | GACCACGCGTATCGATGTCGAGTGCATCCAGTTCAGCAGTT                   |
| P_pck_1_for                                                 | TAGCGGAGTGCTTGGATTGTG                                       |
| P_pck_1_rev                                                 | TGCGATCCAGTTCAGCAGTT                                        |
| P_pck_2_rev                                                 | GAGAGCACCCGTTTAAATAGCC                                      |
| P_pck_3_for                                                 | GGCTATTTAAACGGGTGCTCTC                                      |
| P_pck_4_rev                                                 | CACATTCAGGGGACAACCTTCC                                      |
| P_pck_5_for                                                 | GGAAAGTTGTCCCCTGGAATGTG                                     |
| P_pck_6_rev                                                 | CTTTAGGTGAGACAACGGACAC                                      |
| P_pck_7_for                                                 | GTGTCCGTTGTCTCACCTAAAG                                      |
| P_pck_8_rev                                                 | GGCAACAAAACGCCAAGAACAGC                                     |
| P_pck_9_for                                                 | GCTGTTCTTGGCGTTTTGTTGCC                                     |
| P_pck_10_rev                                                | CACTTAACATTCGGACAATAGG                                      |
| P_pck_11_rev                                                | CCCAGTTTTCCACCATTAACAC                                      |
| P_pck_12_for                                                | GTGTTAATGGTGGGAAAACCTG                                      |
| P_pck_13_for                                                | CCTATTGTCCGAATGTTAAGTG                                      |
| P_iolRC_1_for                                               | GCTGGCCAAAATGGGAGCTTC                                       |
| P_iolRC_1_rev                                               | TCGTGAGTGCTCGTCAAGTTAG                                      |
| P_iolRC_2_rev                                               | CATGAGCTTGTGGGTGGGC                                         |
| P_iolRC_3_for                                               | GCCCACCAACAAGCTCATG                                         |
| P_iolRC_3_rev                                               | AAGACCACCACCCGCAACTC                                        |
| P_iolRC_4_for                                               | GAGTTGCGGGTGGTGGTCTT                                        |
| P_iolRC_4_rev                                               | CAATAAAAGCCCTGGATGACACA                                     |
| P_iolRC_5_for                                               | TGTGTCATCCAGGGCTTTTATTG                                     |
| P_iolRC_5_rev                                               | GACCTGCAAACCTCTGCC                                          |
| P_iolRC_6_for                                               | GGGCAGAGTTTGCAGGTC                                          |
| P_iolRC_6_rev                                               | CTTGTCGACGAAAACCCCTCG                                       |
| P_iolRC_7_for                                               | CGAGGGGGTTTTCGTCGACAAG                                      |
| P_iolRC_7_rev                                               | CCCGAAAACGCGCAAAACCC                                        |

|                |                          |
|----------------|--------------------------|
| P_iolRC_8_for  | GGGTTTTGCGCGTTTTTCGGG    |
| P_iolRC_8_rev  | CCTGACAAAGCAATACATTTCCG  |
| P_iolRC_9_for  | CGGAAATGTATTGCTTTGTCAGG  |
| P_iolRC_9_rev  | GACCCTCACGATCGCATGTC     |
| P_iolRC_10_for | TCGTGAGGGTCGCCACATTC     |
| P_iolT1_1_for  | CCGCACCCTTATCCAGAAAC     |
| P_iolT1_1_rev  | GGCCTGAATGAAGGTACTAGCC   |
| P_iolT1_2_rev  | GGGTGTCTGCTTGGGTATGG     |
| P_iolT1_3_for  | CCATACCCAAGCAGACACCC     |
| P_iolT1_4_rev  | CTTTAATCGTGGCAGACACG     |
| P_iolT1_5_for  | CGTGTCTGCCACGATTAAAG     |
| P_iolT1_6_for  | ACATTGGTGATGTGAATCACTGCC |

Complementary oligonucleotides for gel shift assays

|              |                                   |
|--------------|-----------------------------------|
| P_iolT1_O1+  | ATGGAAAACCATAACCCAAGCAGACACCCCC   |
| P_iolT1_O1-  | GGGGGTGTCTGCTTGGGTATGGTTTTCCAT    |
| P_iolT1_O2+  | CAAGCAGACACCCCCACCCCTAAGTATTAC    |
| P_iolT1_O2-  | GTAATACTTAGGGGTGGGGTGTCTGCTTG     |
| P_iolT1_O3+  | ACCCCTAAGTATTACCAATTACTCAAAAGT    |
| P_iolT1_O3-  | ACTTTTTGAGTAATTGGTAATACTTAGGGGT   |
| P_iolT1_O4+  | CAATTACTCAAAAGTATTCAAAAAAGTTT     |
| P_iolT1_O4-  | AACTTTTTTTTGAATACTTTTGAGTAATTG    |
| P_iolT1_O5+  | ATTCAAAAAAGTTTGTTATGTACGATTGA     |
| P_iolT1_O5-  | TCAATCGTACATAACAACTTTTTTTGAAT     |
| P_iolT1_O6+  | GTTATGTACGATTGACGGGACATATCGTGT    |
| P_iolT1_O6-  | ACACGATATGTCCCGTCAATCGTACATAAC    |
| P_iolT1_O7+  | CGGGACATATCGTGTCTGCCACGATTAAAG    |
| P_iolT1_O7-  | CTTTAATCGTGGCAGACACGATATGTCCCG    |
| P_iolRC_O1+  | GTTGCCCACCCAACAAGCTCATGTAAATGT    |
| P_iolRC_O1-  | ACATTTACATGAGCTTGTTGGGTGGGCAAC    |
| P_iolRC_O2+  | AGCTCATGTAAATGTGTTAGGACATTTGAA    |
| P_iolRC_O2-  | TTCAAATGTCCTAACACATTTACATGAGCT    |
| P_iolRC_O3+  | GTTAGGACATTTGAACAATGTAAGTACTGAGTT |
| P_iolRC_O3-  | AACTCAGTTACATTGTTCAAATGTCCTAAC    |
| P_iolRC_O4+  | CAATGTAAGTACTGAGTTGCGGGTGGTGGTCTT |
| P_iolRC_O4-  | AAGACCACCACCCGCAACTCAGTTACATTG    |
| P_iolRC_O5+  | TATTGATCTGACATTATCACTTGCATTAGG    |
| P_iolRC_O5-  | CCTAATGCAAGTGATAATGTCAGATCAATA    |
| P_iolRC_O6+  | ATCACTTGCAATTAGGGAATGAGTAGCGAAA   |
| P_iolRC_O6-  | TTTCGCTACTCATTCCCTAATGCAAGTGAT    |
| P_iolRC_O7+  | GAATGAGTAGCGAAACTTAGTGAAAAGGGC    |
| P_iolRC_O7-  | GCCCTTTTCACTAAGTTTCGCTACTCATT     |
| P_iolRC_O8+  | CTTAGTGAAAAGGGCAGAGTTTGCAGGTCA    |
| P_iolRC_O8-  | TGACCTGCAAACTCTGCCCTTTTCACTAAG    |
| P_iolRC_O9+  | AGAGTTTGCAGGTCATAACGTGCAACTTTG    |
| P_iolRC_O9-  | CAAAGTTGCACGTTATGACCTGCAAACTCT    |
| P_iolRC_O10+ | TAACGTGCAACTTTGTAAACCCCGCACCTT    |

|                    |                                 |
|--------------------|---------------------------------|
| P_iolRC_O10-       | AAGGTGCGGGGTTAACAAAGTTGCACGTTA  |
| P_iolRC_O11+       | CGGAAATGTATTGCTTTGTCAGGACAATGTG |
| P_iolRC_O11-       | CACATTGTCTTGACAAAGCAATACATTTCCG |
| P_iolRC_O12+       | CTTTGTCAGGACAATGTGTTATTGTGCATGA |
| P_iolRC_O12-       | TCATGACAATAACACATTGTCCTGACAAAG  |
| P_iolRC_O13+       | TTATTGTGCATGACATGCGATCGTGAGGGTC |
| P_iolRC_O13-       | GACCCTCACGATCGCATGTCATGACAATAA  |
| IolR_BS_P_iolC_M1+ | TATGTAGTTGTCAGGACAATGTGTTA      |
| IolR_BS_P_iolC_M1- | TAACACATTGTCCTGACAACACTACATA    |
| IolR_BS_P_iolC_M2+ | TATTGCTGGTGCAGGACAATGTGTTA      |
| IolR_BS_P_iolC_M2- | TAACACATTGTCCTGCACCAGCAATA      |
| IolR_BS_P_iolC_M3+ | TATTGCTTTGTACTTACAATGTGTTA      |
| IolR_BS_P_iolC_M3- | TAACACATTGTAAGTACAAAGCAATA      |
| IolR_BS_P_iolC_M4+ | TATTGCTTTGTCAGGCACCTGTGTTA      |
| IolR_BS_P_iolC_M4- | TAACACAGGTGCCTGACAAAGCAATA      |
| IolR_BS_P_iolC_M5+ | TATTGCTTTGTCAGGACAAGTGTTA       |
| IolR_BS_P_iolC_M5- | TAAACACTTGCCTGACAAAGCAATA       |
| IolR_BS_P_pck_O1+  | TCCGAATGTTAAGTGTTAATGGT         |
| IolR_BS_P_pck_O1-  | ACCATTAACACTTAACATTCGGA         |
| IolR_BS_P_pck_M1+  | TCCGAATGTTAAGACAAAATGGT         |
| IolR_BS_P_pck_M1-  | ACCATTTTGTCTTAACATTCGGA         |
| IolR_BS_P_pck_M2+  | TCCGACGTGTAAGTGTTAATGGT         |
| IolR_BS_P_pck_M2-  | ACCATTAACACTTACACGTCGGA         |
| IolR_BS_P_pck_M3+  | TCCGAATGTTAAGGTGGAATGGT         |
| IolR_BS_P_pck_M3-  | ACCATTCCACCTTAACATTCGGA         |
| IolR_BS_P_pck_M4+  | TCCGACGTGTAAGGTGGAATGGT         |
| IolR_BS_P_pck_M4-  | ACCATTCCACCTTACACGTCGGA         |

---

<sup>a</sup> Recognition sites for restriction endonucleases are underlined, restriction endonucleases are indicated in parentheses. Complementary sequences for nested PCR or for generating overlap-extension PCR products are printed in italics.

**Table S2.** Transcriptional start sites of *iolR*, *iolC*, and *iolT1*

| Gene                       | Sequence <sup>a</sup>                                                                                                                  |
|----------------------------|----------------------------------------------------------------------------------------------------------------------------------------|
| cg0196<br>( <i>iolR</i> )  | cactaagtttcgc <u>TactCA</u> ttccctaagT <u>GaTA</u> atgTcagatc <b>AA</b>                                                                |
| cg0197<br>( <i>iolC</i> )  | taatnttcggaaatgta <u>TtgC</u> ttgtcaggacaatgT <u>GtTAT</u> tgTcatgac <b>A</b>                                                          |
| cg0223<br>( <i>iolT1</i> ) | tcaaaagTattCAaaaaaagtttgttatgTAcgATtgacggg <b>A</b><br>tcaaaagtattcaaaaaaagtttgttatgtacgaTTGACgggacatatcgtgtcTGccAcgATtaaagac <b>A</b> |

<sup>a</sup>Transcriptional start sites (TSS, bold) were identified by RNAseq as described in the Methods. The -35 and -10 regions are underlined and conserved bases are indicated by capitals. Two TSS were identified for the genes *iolR* and *iolT1*, with higher amounts of transcript starting from the TSS proximal to the start codon.

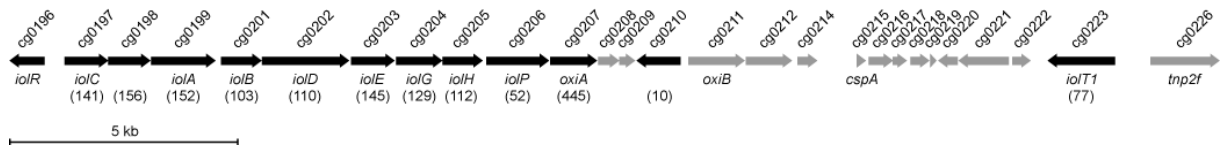

FIG. S1. Map of the *C. glutamicum* genome region (position 167,835 to 194,468 of NC\_006958) encoding functions relevant for *myo*-inositol catabolism. Genes exhibiting a  $\geq 10$ -fold increased mRNA level in the  $\Delta iolR$  mutant compared to the wild-type are shown in black and the ratio for each gene is given in parentheses.
